# Supplementary material for: Clinical utility of microRNA-378 as early diagnostic biomarker of human cancers: a meta-analysis of diagnostic test
Source: PubMed Central journal article supplement (PMC5295453; doi:10.18632/oncotarget.10707), 2016-07-19
Supplement: oncotarget-07-58569-s001.pdf [file oncotarget-07-58569-s001.pdf]

# Clinical utility of microRNA-378 as early diagnostic biomarker of human cancers: a meta-analysis of diagnostic test

## Supplementary Materials

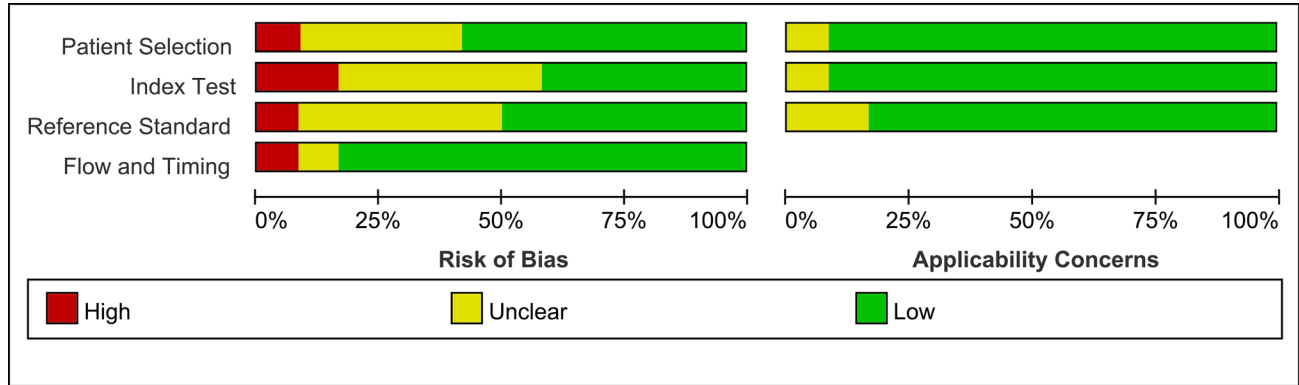

**Supplementary Figure S1: Risk of bias and applicability concerns graph: review authors' judgements about each domain presented as percentages across included studies.**

|              | <u>Risk of Bias</u> |            |                    |                 | <u>Applicability Concerns</u> |            |                    |
|--------------|---------------------|------------|--------------------|-----------------|-------------------------------|------------|--------------------|
|              | Patient Selection   | Index Test | Reference Standard | Flow and Timing | Patient Selection             | Index Test | Reference Standard |
| Fedorko 2015 | ?                   | +          | -                  | +               | +                             | +          | +                  |
| Hauser 2012  | +                   | ?          | +                  | +               | +                             | +          | +                  |
| Li 2013      | -                   | +          | +                  | +               | ?                             | +          | +                  |
| Li 2013      | +                   | ?          | ?                  | +               | +                             | +          | +                  |
| Li 2015      | +                   | ?          | +                  | +               | +                             | +          | ?                  |
| Liu 2012     | ?                   | +          | ?                  | +               | +                             | +          | +                  |
| Liu 2013     | +                   | +          | +                  | +               | +                             | ?          | +                  |
| Peng 2015    | +                   | -          | ?                  | +               | +                             | +          | +                  |
| Redova 2012  | +                   | ?          | +                  | +               | +                             | +          | +                  |
| Wang 2015    | ?                   | -          | ?                  | +               | +                             | +          | +                  |
| Yin 2014     | ?                   | +          | +                  | ?               | +                             | +          | +                  |
| Zanutto 2014 | +                   | ?          | ?                  | -               | +                             | +          | ?                  |

  

|                                                                                                 |                                                                                                    |                                                                                                  |
|-------------------------------------------------------------------------------------------------|----------------------------------------------------------------------------------------------------|--------------------------------------------------------------------------------------------------|
|  <b>High</b> |  <b>Unclear</b> |  <b>Low</b> |
|-------------------------------------------------------------------------------------------------|----------------------------------------------------------------------------------------------------|--------------------------------------------------------------------------------------------------|

Supplementary Figure S2: Risk of bias and applicability concerns summary: review authors' judgements about each domain for each included study.

Supplementary Table S1: Preferred reporting items for systematic reviews and meta-analyses. See Supplementary\_Table\_S1
